# Supplementary material for: Association of the FCN2 Gene Promoter Region Polymorphisms with Very Low Birthweight in Preterm Neonates
Source: MDPI journal article supplement (doi:10.3390/ijms232315336), 2022-12-05
Supplement: s1 [file s1]

**Supplementary Table S1.** Hardy-Weinberg expectation statistics for investigated *FCN2* gene promoter polymorphisms. SNP was considered to adhere to Hardy-Weinberg expectation when  $p>0.01$ .

| Polymorphism         | p value |
|----------------------|---------|
| rs3124952 (-986 A>G) | 0.0444  |
| rs3124953 (-602 G>A) | 0.2742  |
| rs7865453 (-64 A>C)  | 0.4234  |
| rs17514136 (-4 A>G)  | 0.0807  |

**Supplementary Table S2.** Distribution of genotypes associated with *FCN2* gene promoter polymorphisms in preterm newborns, depending on incidence of respiratory distress syndrome, early-onset infection, pneumonia and sepsis. None of associations analysed apperaed significant ( $p>0.05$ ).

| Polymorphism          | Genotype | Respiratory distress syndrome |            | Early-onset infection |            | Pneumonia |            | Sepsis    |            |
|-----------------------|----------|-------------------------------|------------|-----------------------|------------|-----------|------------|-----------|------------|
|                       |          | Yes                           | No         | Yes                   | No         | Yes       | No         | Yes       | No         |
|                       |          | N (%)                         | N (%)      | N (%)                 | N (%)      | N (%)     | N (%)      | N (%)     | N (%)      |
| rs3124952<br>-986 A>G | A/A      | 41 (31.8)                     | 135 (36.6) | 35 (33)               | 141 (35.8) | 18 (38.3) | 158 (35)   | 4 (25)    | 172 (35.5) |
|                       | A/G      | 71 (55)                       | 190 (51.5) | 59 (55.7)             | 204 (51.8) | 27 (57.4) | 235 (52)   | 11 (68.8) | 252 (52.1) |
|                       | G/G      | 17 (13.2)                     | 44 (11.9)  | 12 (11.3)             | 49 (12.4)  | 2 (4.3)   | 59 (13)    | 1 (6.3)   | 60 (12.4)  |
| rs3124953<br>-602 G>A | G/G      | 82 (63.6)                     | 229 (62.1) | 63 (59.4)             | 250 (63.5) | 24 (51.1) | 288 (63.7) | 8 (50)    | 305 (63)   |
|                       | G/A      | 44 (34.1)                     | 126 (34.1) | 38 (35.8)             | 132 (33.5) | 20 (42.6) | 150 (33.2) | 8 (50)    | 162 (33.5) |
|                       | A/A      | 3 (2.3)                       | 14 (3.8)   | 5 (4.7)               | 12 (3)     | 3 (6.4)   | 14 (3.1)   | 0 (0)     | 17 (3.5)   |
| rs7865453<br>-64 A>C  | A/A      | 96 (74.4)                     | 292 (79.1) | 81 (76.4)             | 309 (78.4) | 40 (85.1) | 349 (77.2) | 15 (93.8) | 375 (77.5) |
|                       | A/C      | 33 (25.6)                     | 73 (19.8)  | 24 (22.6)             | 82 (20.8)  | 7 (14.9)  | 99 (21.9)  | 1 (6.3)   | 105 (21.7) |
|                       | C/C      | 0 (0)                         | 4 (1.1)    | 1 (0.9)               | 3 (0.8)    | 0 (0)     | 4 (0.9)    | 0 (0)     | 4 (0.8)    |
| rs17514136<br>-4 A>G  | A/A      | 48 (37.2)                     | 155 (42)   | 44 (41.5)             | 159 (40.4) | 20 (42.6) | 183 (40.5) | 6 (37.5)  | 197 (40.7) |
|                       | A/G      | 69 (53.5)                     | 175 (47.4) | 56 (52.8)             | 189 (48)   | 24 (51.1) | 221 (48.9) | 10 (62.5) | 236 (48.8) |
|                       | G/G      | 12 (9.3)                      | 39 (10.6)  | 6 (5.7)               | 46 (11.7)  | 3 (6.4)   | 48 (10.6)  | 0 (0)     | 51 (10.5)  |

**Supplementary Table S3.** Frequencies of the most common haplotypes in preterm newborns, depending on incidence of respiratory distress syndrome, early-onset infection, pneumonia and sepsis. None of associations analysed apperaed significant ( $p>0.05$ ).

| Haplot<br>ype | Respiratory distress syndrome |           |     |           | Early-onset infection |           |     |           | Pneumonia |           |     |           | Sepsis |           |     |           |
|---------------|-------------------------------|-----------|-----|-----------|-----------------------|-----------|-----|-----------|-----------|-----------|-----|-----------|--------|-----------|-----|-----------|
|               | Yes                           |           | No  |           | Yes                   |           | No  |           | Yes       |           | No  |           | Yes    |           | No  |           |
|               | N                             | frequency | N   | frequency | N                     | frequency | N   | Frequency | N         | frequency | N   | frequency | N      | frequency | N   | frequency |
| AGAG          | 83                            | 0.322     | 222 | 0.302     | 61                    | 0.288     | 246 | 0.312     | 28        | 0.292     | 279 | 0.309     | 8      | 0.25      | 299 | 0.309     |
| GGAA          | 62                            | 0.24      | 178 | 0.242     | 51                    | 0.241     | 192 | 0.244     | 23        | 0.24      | 220 | 0.243     | 10     | 0.313     | 233 | 0.241     |
| AAAA          | 44                            | 0.171     | 147 | 0.2       | 46                    | 0.217     | 146 | 0.185     | 24        | 0.25      | 168 | 0.186     | 8      | 0.25      | 184 | 0.19      |
| AGAA          | 23                            | 0.089     | 76  | 0.103     | 21                    | 0.099     | 78  | 0.099     | 11        | 0.115     | 88  | 0.097     | 3      | 0.094     | 96  | 0.099     |
| GGCA          | 27                            | 0.105     | 70  | 0.095     | 23                    | 0.108     | 74  | 0.094     | 5         | 0.052     | 92  | 0.102     | 1      | 0.031     | 96  | 0.099     |

**Supplementary Table S4.** Frequencies of the most common diplotypes in preterm newborns, depending on incidence of respiratory distress syndrome, early-onset infection, pneumonia and sepsis. None of associations analysed apperaed significant ( $p>0.05$ ).

| Diplotype |           | Respiratory distress syndrome |      |    |      | Early-onset infection |      |    |      | Pneumonia |      |    |      | Sepsis |      |    |      |
|-----------|-----------|-------------------------------|------|----|------|-----------------------|------|----|------|-----------|------|----|------|--------|------|----|------|
|           |           | Yes                           |      | No |      | Yes                   |      | No |      | Yes       |      | No |      | Yes    |      | No |      |
|           |           | N                             | %    | N  | %    | N                     | %    | N  | %    | N         | %    | N  | %    | N      | %    | N  | %    |
| 1         | AGAG/GGAA | 28                            | 21.7 | 64 | 17.4 | 20                    | 18.9 | 74 | 18.8 | 8         | 16.7 | 86 | 19   | 5      | 31.3 | 89 | 18.4 |
| 2         | AGAG/AAAA | 14                            | 10.9 | 46 | 12.5 | 16                    | 15.1 | 44 | 11.2 | 7         | 14.6 | 53 | 11.7 | 3      | 18.8 | 57 | 11.8 |
| 3         | AAAA/GGAA | 10                            | 7.8  | 35 | 9.5  | 9                     | 8.5  | 37 | 9.4  | 7         | 14.6 | 39 | 8.6  | 2      | 12.5 | 44 | 9.1  |
| 4         | AGAG/AGAG | 12                            | 9.3  | 29 | 7.9  | 6                     | 5.7  | 35 | 8.9  | 3         | 6.3  | 38 | 8.4  | 0      | 0    | 41 | 8.5  |
| 5         | AGAG/GGCA | 6                             | 4.7  | 27 | 7.3  | 4                     | 3.8  | 29 | 7.4  | 1         | 2.1  | 32 | 7.1  | 0      | 0    | 33 | 6.8  |
| 6         | AAAA/GGCA | 8                             | 6.2  | 21 | 5.7  | 7                     | 6.6  | 22 | 5.6  | 1         | 2.1  | 28 | 6.2  | 1      | 6.3  | 28 | 5.8  |
| 7         | AGAA/GGAA | 7                             | 5.4  | 20 | 5.4  | 8                     | 7.5  | 19 | 4.8  | 5         | 10.4 | 22 | 4.9  | 1      | 6.3  | 26 | 5.4  |
| 8         | GGAA/GGAA | 4                             | 3.1  | 24 | 6.5  | 5                     | 4.7  | 23 | 5.8  | 1         | 2.1  | 27 | 6    | 1      | 6.3  | 27 | 5.6  |
| 9         | AGAA/AGAG | 7                             | 5.4  | 17 | 4.6  | 6                     | 5.7  | 18 | 4.6  | 4         | 8.3  | 20 | 4.4  | 0      | 0    | 24 | 5    |
| 10        | AAAA/GGAG | 7                             | 5.4  | 14 | 3.8  | 4                     | 3.8  | 17 | 4.3  | 3         | 6.3  | 18 | 4    | 2      | 12.5 | 19 | 3.9  |

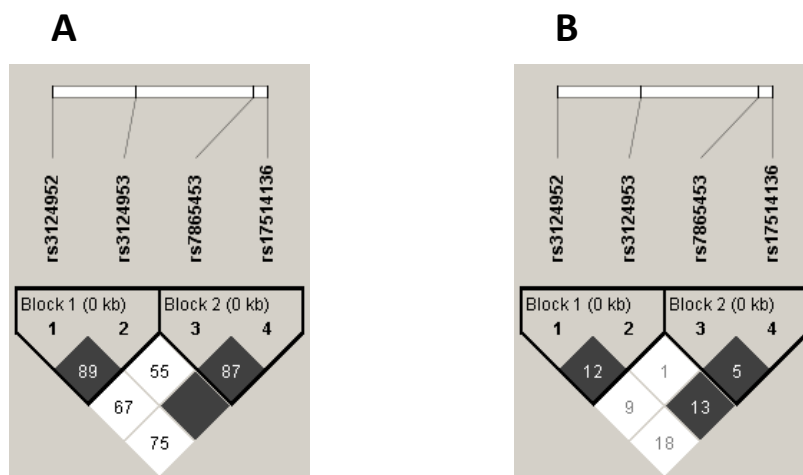

**Supplementary Figure S1.** Linkage disequilibrium analysis of promoter rs3124952 (-986 A>G), rs3124953 (-602 G>A), rs7865453 (-64 A>C), and rs17514136 (-4 A>G) *FCN2* single nucleotide polymorphisms. The numbers in the grid refer to  $D'$  (**A**) and  $r^2$  (**B**) parameters of the given pairs of SNPs. Bolded triangles shows haplotype blocks identified using four gamete rule test.

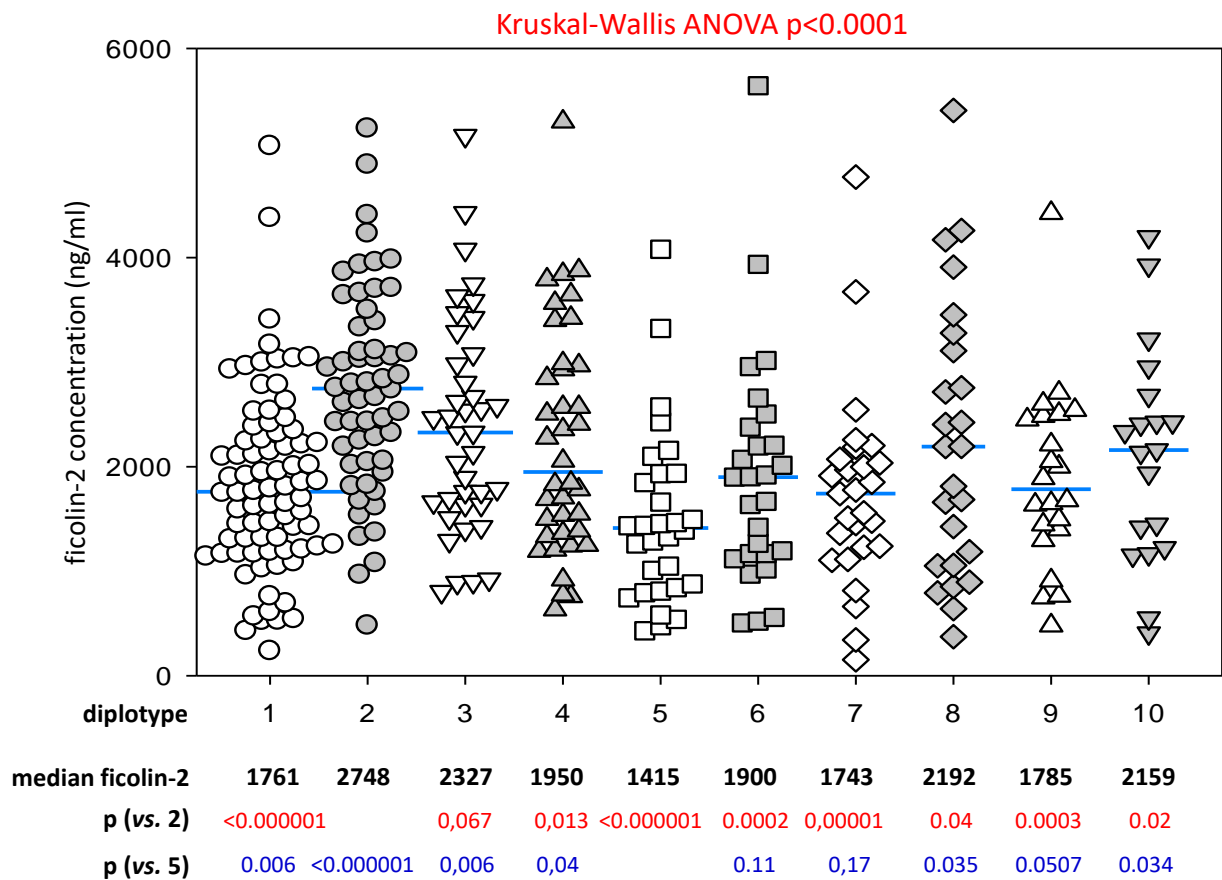

**Supplementary Figure S2.** Individual concentrations of ficolin-2 in cord sera from preterm newborns, corresponding to 10 most common *FCN2* gene promoter diplotypes. Blue bars represent median values (given below the graph in bold). Medians related to diplotypes 2 (the highest) and 5 (the lowest one) were compared with remaining values using Mann-Whitney *U* test. Corresponding *p* values are given below the graph in red and blue, respectively.

Diplotypes: 1 – AGAG/GGAA; 2 – AGAG/AAAA; 3 – AAAA/GGAA; 4 – AGAG/AGAG; 5 – AGAG/GGCA; 6 – AAAA/GGCA; 7 – GGAA/GGAA; 8 – AGAA/GGAA; 9 – AGAA/AGAG; 10 – AAAA/GGAG

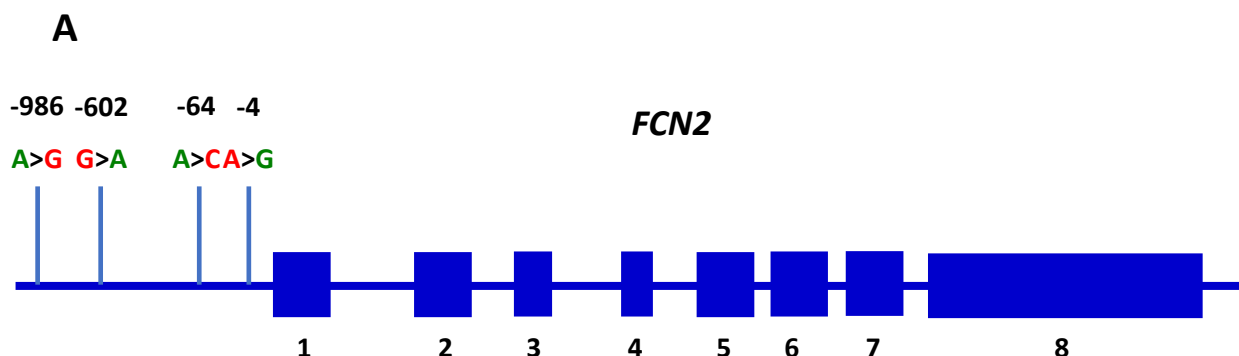

**B**

| Genotypes<br>(polymorphic sites) | Most common<br>haplotypes | Most common<br>diplotypes | Median ficolin-2<br>concentrations |
|----------------------------------|---------------------------|---------------------------|------------------------------------|
| -986                             |                           | AGAG/GGAA                 | 1761                               |
| A/A                              |                           | AGAG/AAAA                 | 2748                               |
| A/G                              |                           | AAAA/GGAA                 | 2327                               |
| G/G                              | AGAG                      | AGAG/AGAG                 | 1950                               |
| -602                             | GGAA                      | AGAG/GGCA                 | 1415                               |
| G/G                              | AAAA                      | AGAA/GGCA                 | 1900                               |
| G/A                              | AGAA                      | GGAA/GGAA                 | 1743                               |
| A/A                              | GGCA                      | AGAA/GGAA                 | 2192                               |
| -64                              | GGAG                      | AGAA/AGAG                 | 1782                               |
| A/A                              |                           | AAAA/GGAG                 | 2159                               |
| A/C                              |                           |                           |                                    |
| C/C                              |                           |                           |                                    |
| -4                               |                           |                           |                                    |
| A/A                              |                           |                           |                                    |
| A/G                              |                           |                           |                                    |
| G/G                              |                           |                           |                                    |

**Supplementary Figure S3. A:** Scheme of the *FCN2* gene with investigated promoter polymorphic sites. Alleles associated with higher gene expression are marked in green while those with lower – with red. Exons 1-8 are shown as blue rectangles. **B:** Genotypes corresponding to polymorphic sites, most common haplotypes, diplotypes and median ficolin-2 concentrations in cord sera (ng/ml), related to demonstrated promoter diplotypes. Alleles corresponding to particular sites, associated with higher gene expression are marked in green while those with lower – with red. Median ficolin-2 levels higher than median for the whole cohort are marked in green while those lower – in red. Genotypes: A/A (-986), A/A (-64), G/G (-4), all corresponding to relatively high *FCN2* gene expression; related AGAG haplotype and AGAG/AGAG diplotype were found associated with lower risk of very low birthweight (green boxes). Furthermore, G/G variant at -4 corresponds to lower risk of birth at gestational age <33 weeks (blue box). The GGCA haplotype (all alleles related to lower gene expression) was found associated with higher risk of VLBW (red box) while AGAG/GGAA diplotype with higher risk of both VLBW and GA <33 weeks (red and orange boxes).
